# Supplementary material for: Imperfect centered miRNA binding sites are common and can mediate repression of target mRNAs
Source: PubMed Central journal article supplement (PMC4053950; doi:10.1186/gb-2014-15-3-r51), 2014-03-14

**miR-10a-iso seed sites**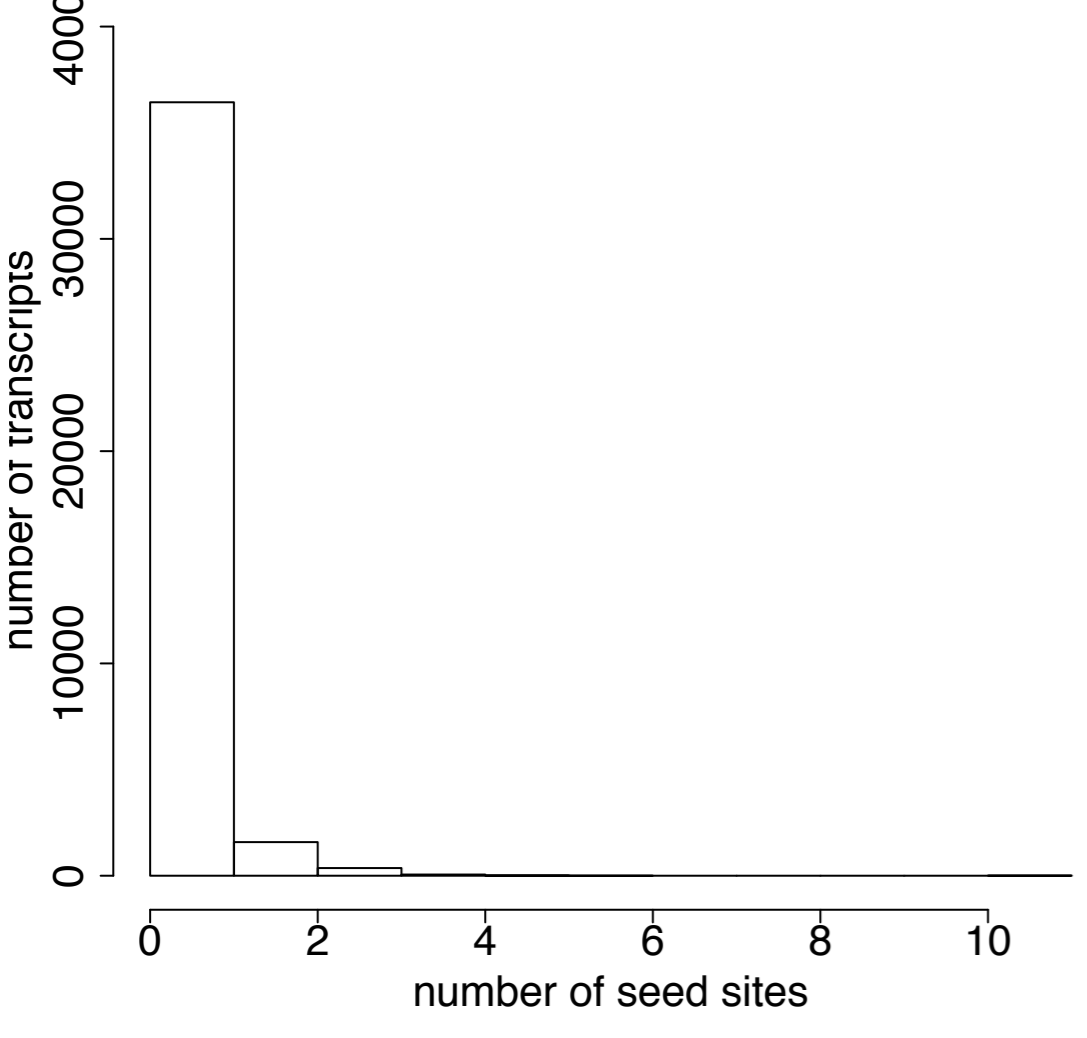**miR-10a-iso centered OMM sites**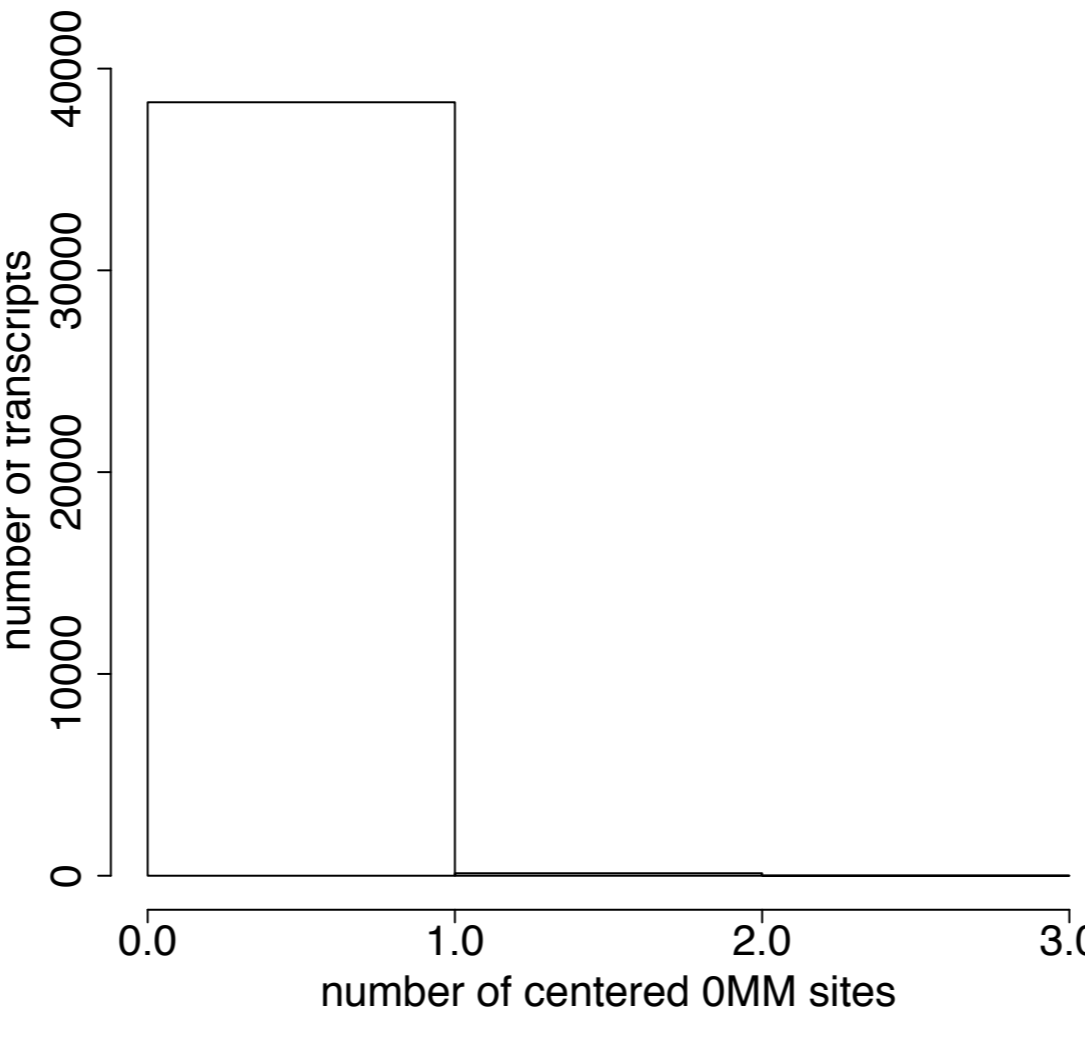**miR-10a-iso centered 1MM sites**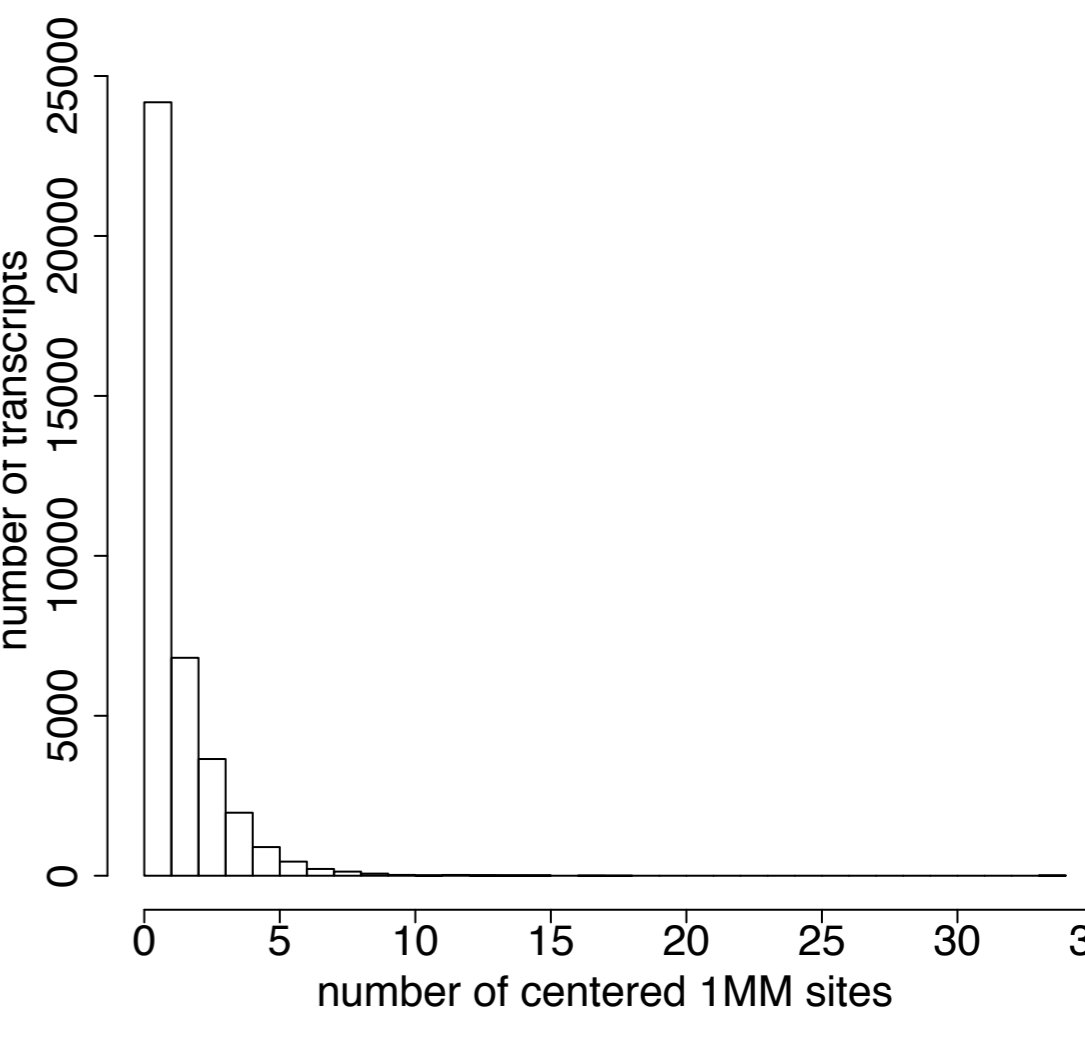**miR-10a seed sites**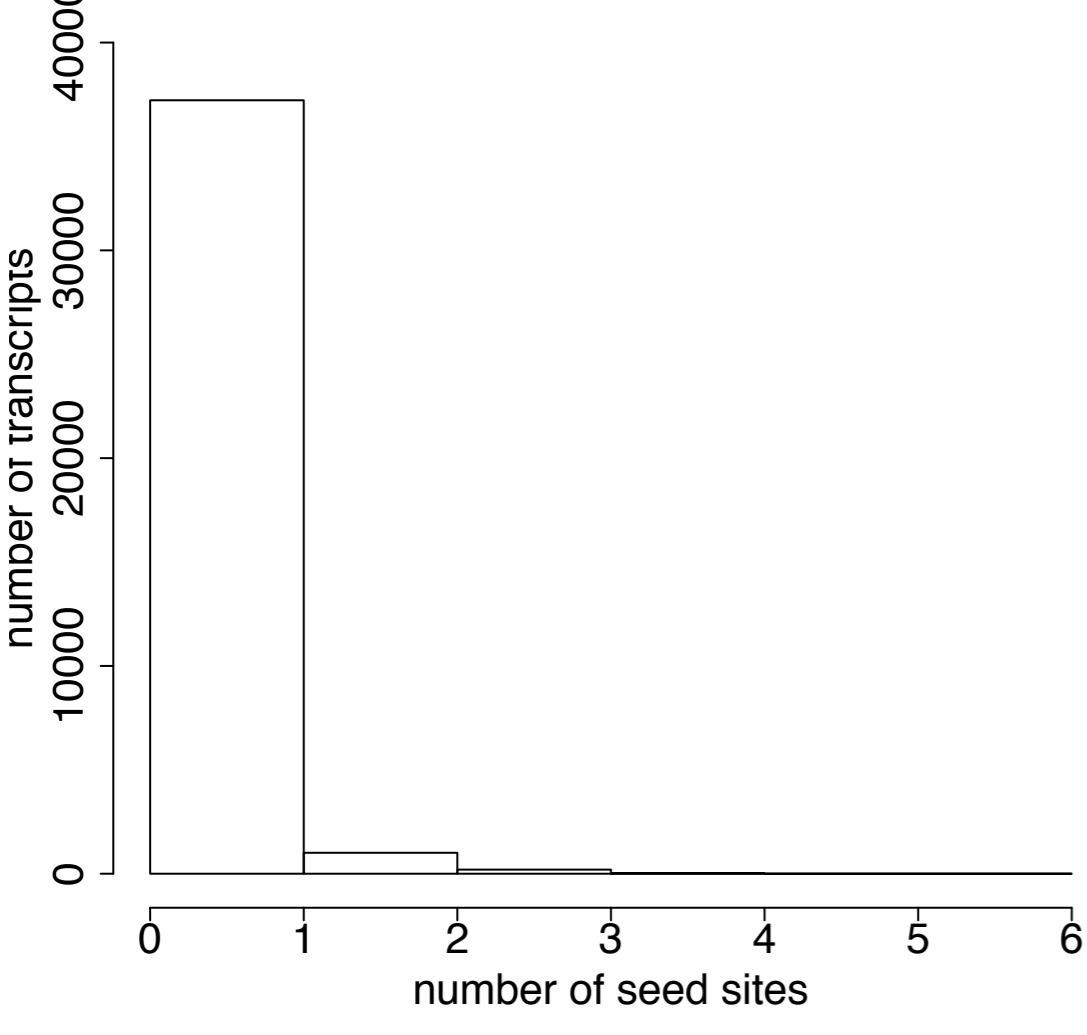**miR-10a centered OMM sites**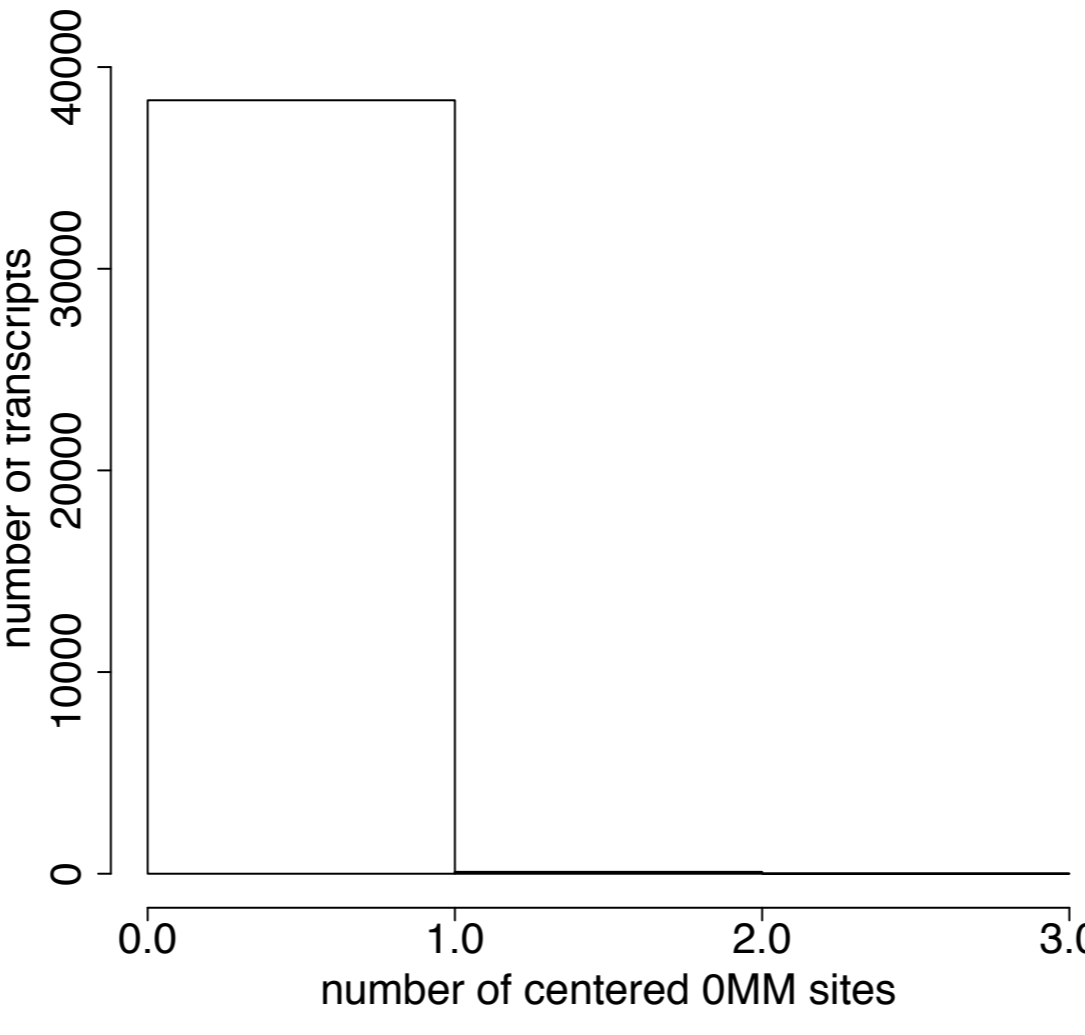**miR-10a centered 1MM sites**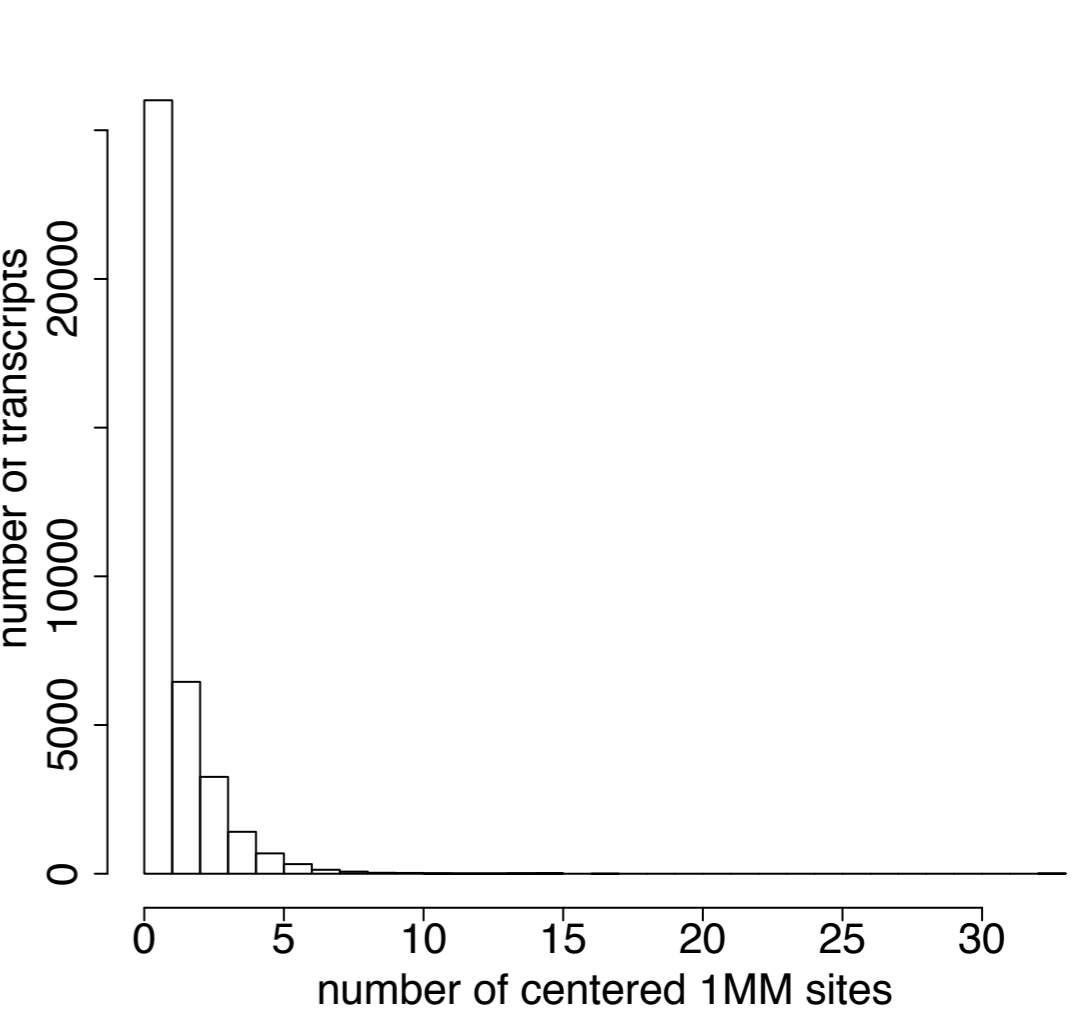**miR-10b-iso seed sites**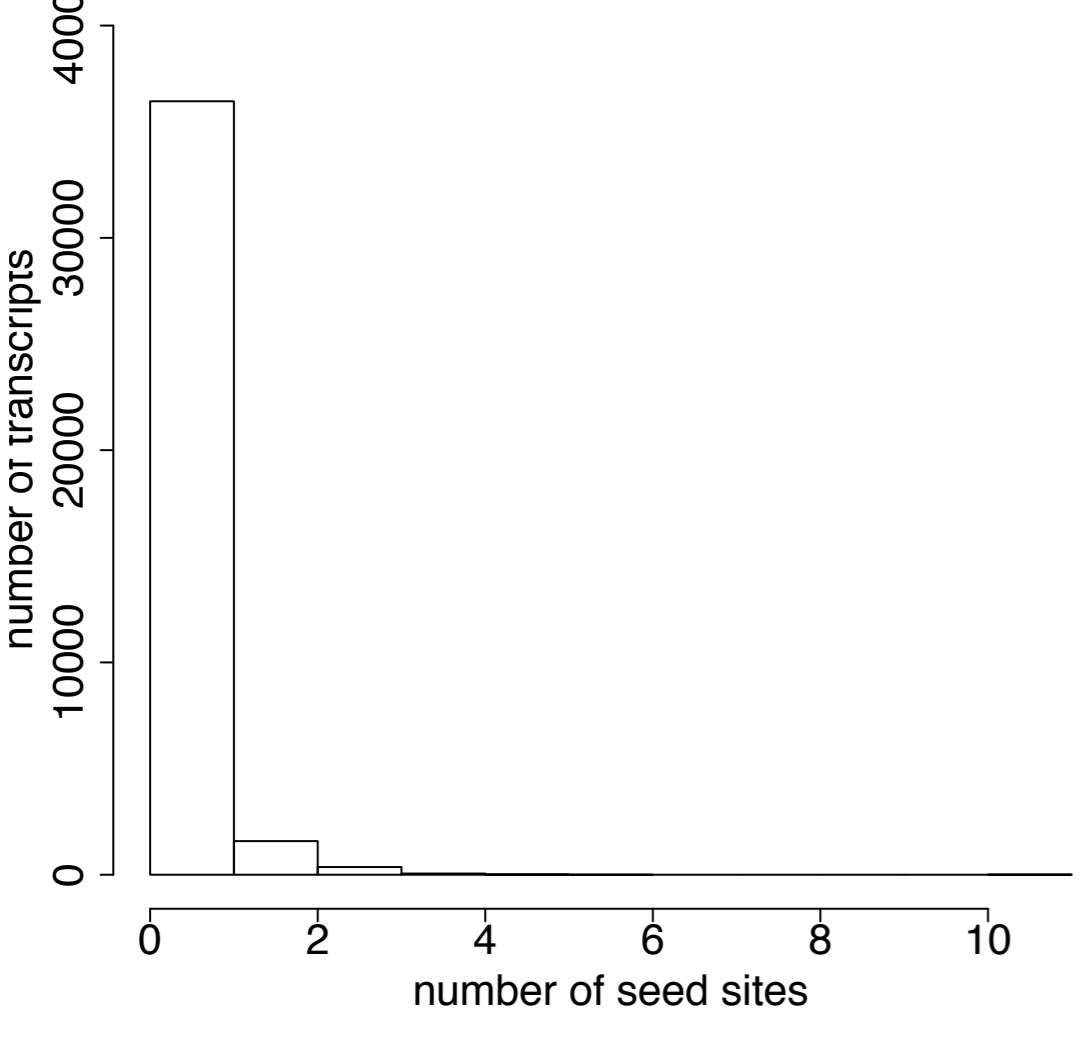**miR-10b-iso centered OMM sites**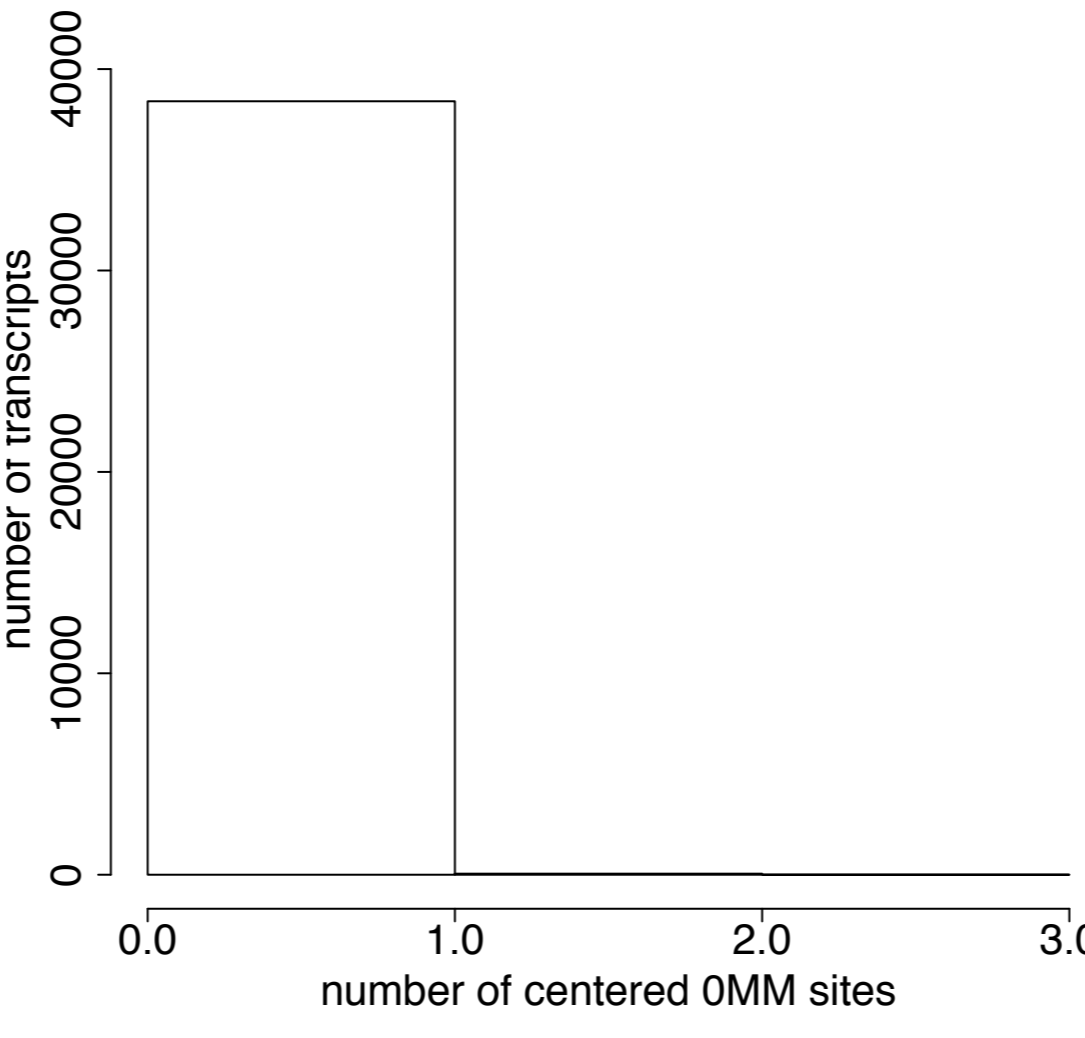**miR-10b-iso centered 1MM sites**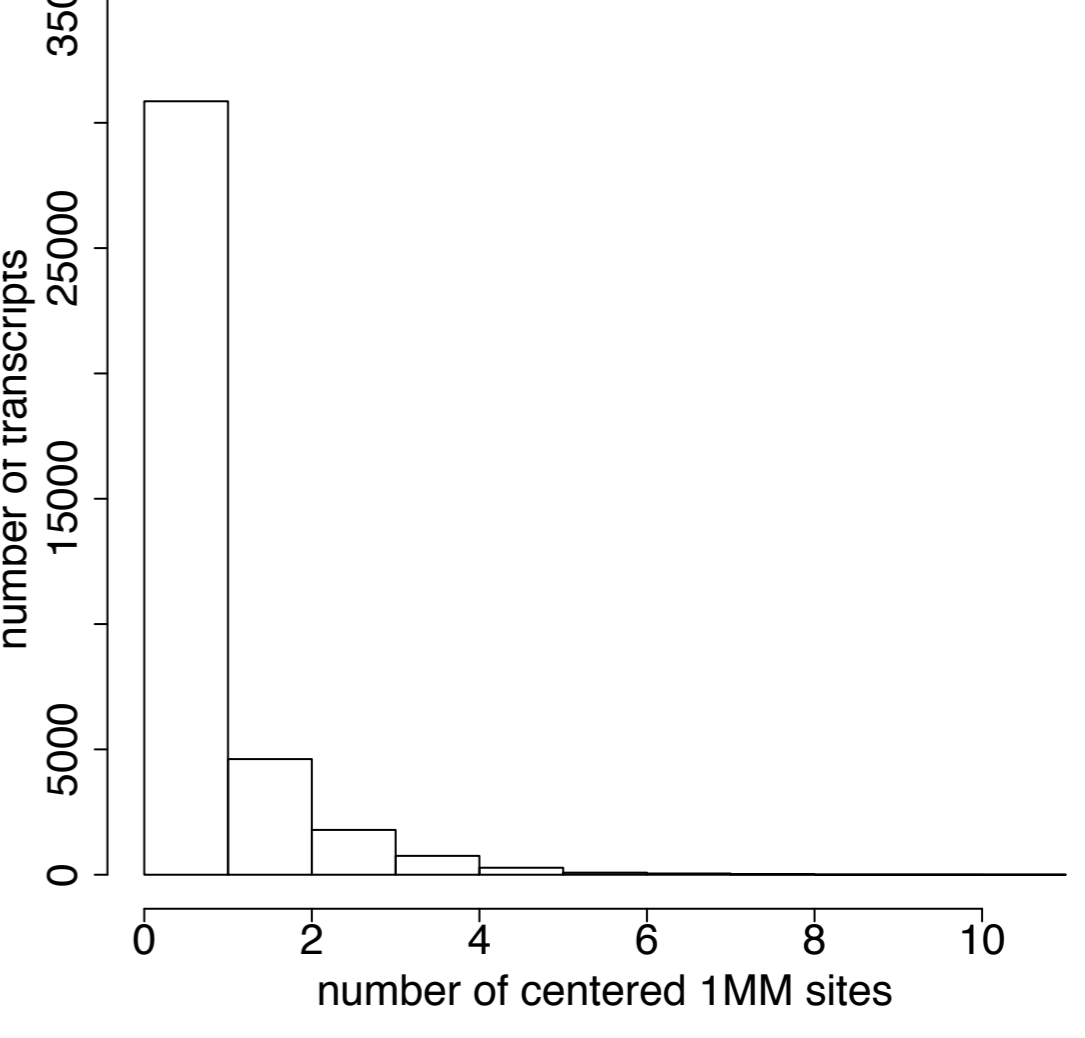**miR-10b seed sites**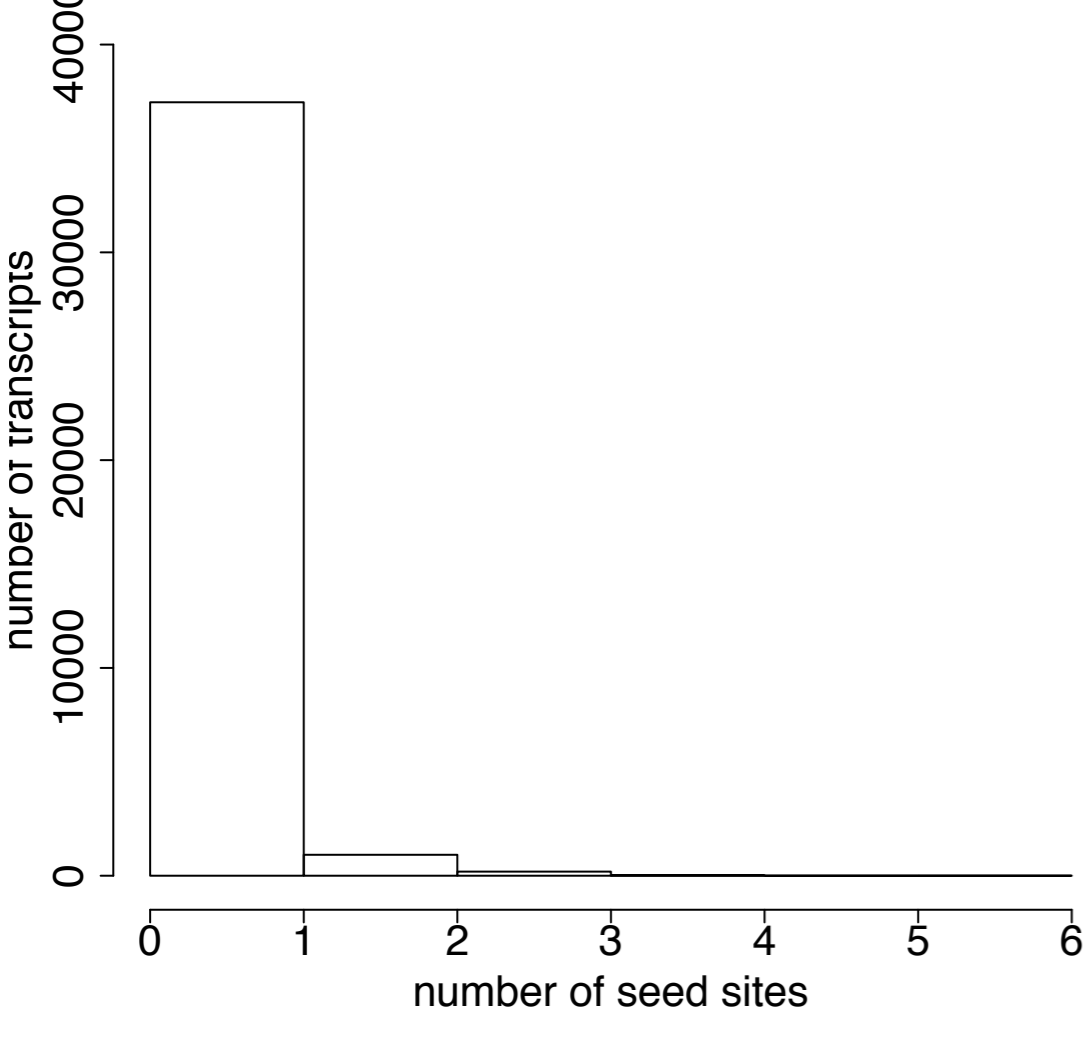**miR-10b centered OMM sites**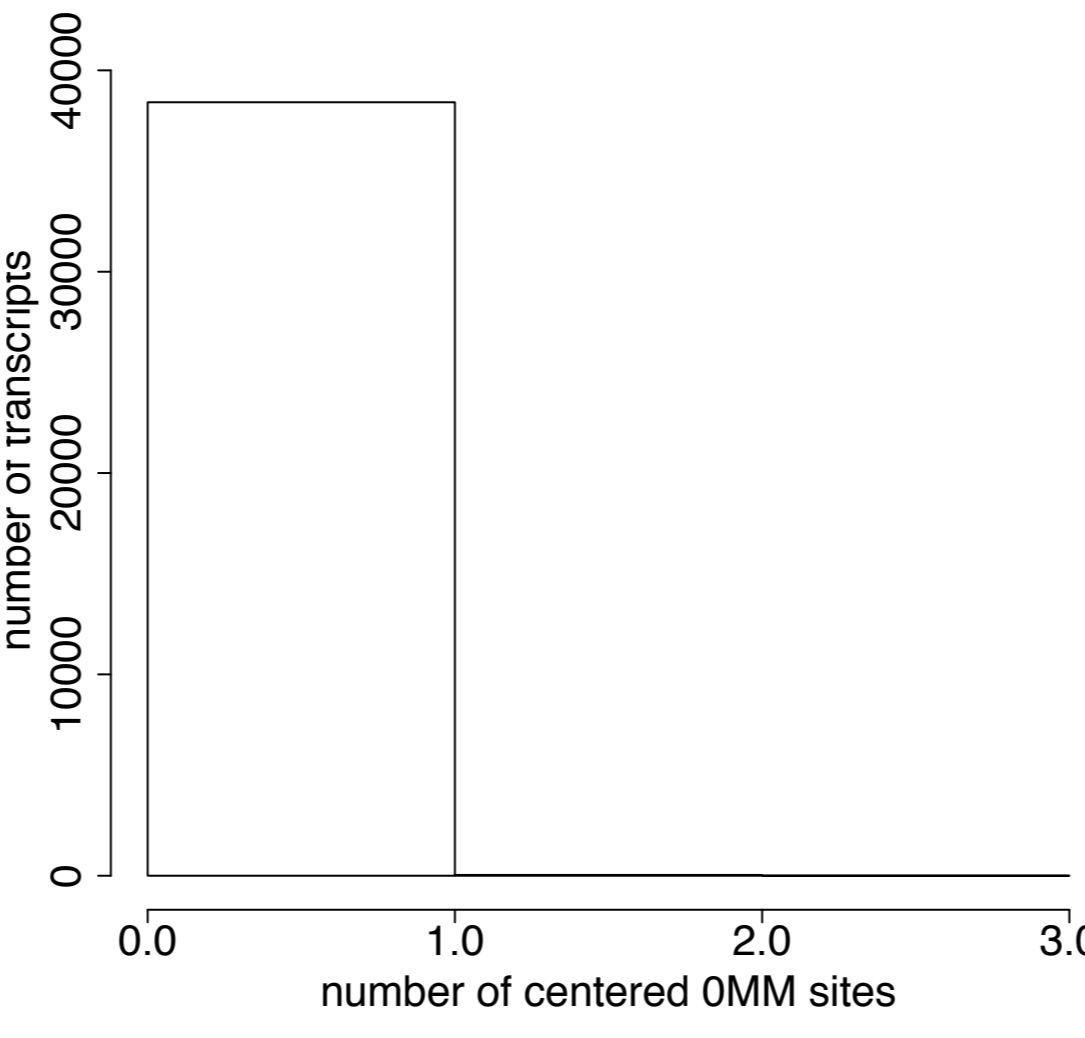**miR-10b centered 1MM sites**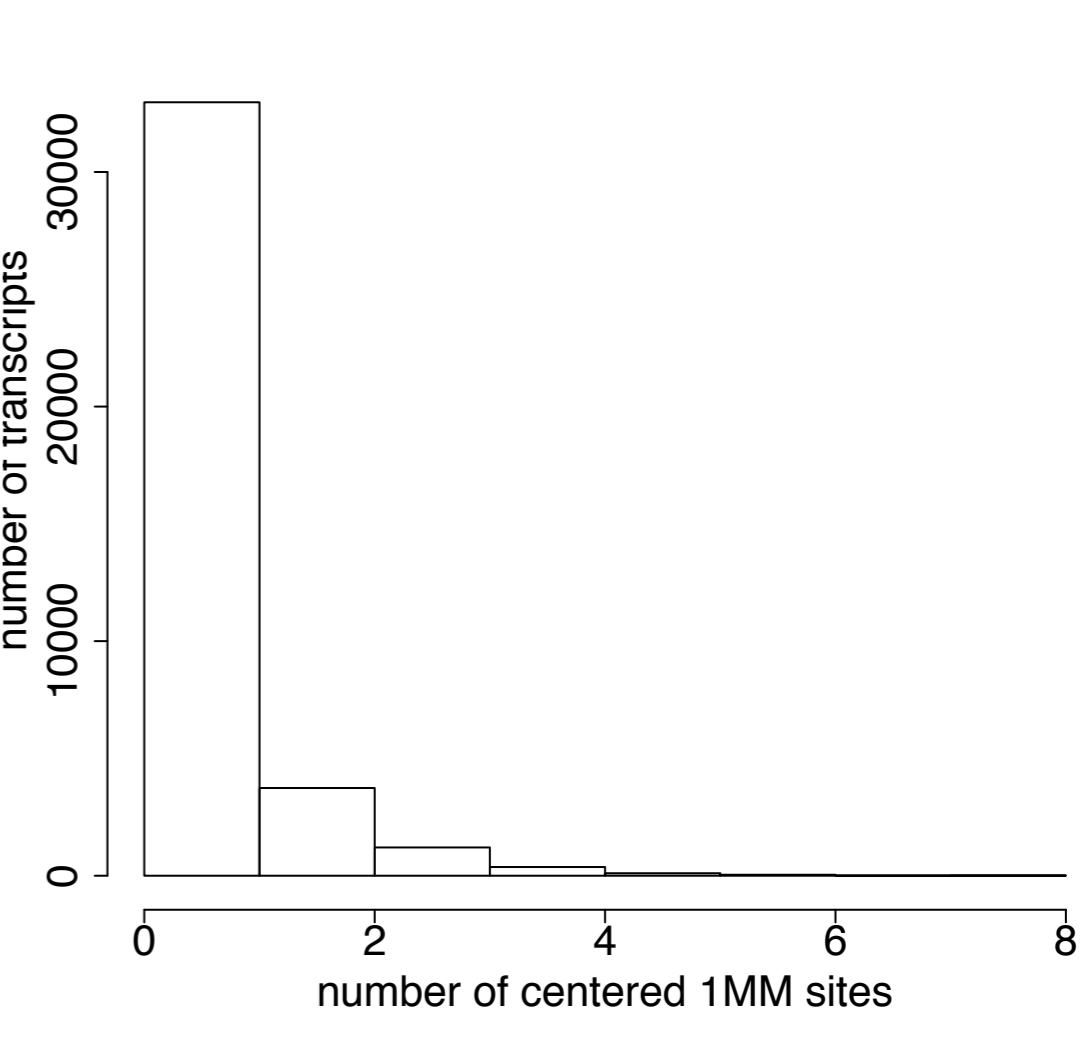**miR-17-5p-iso seed sites**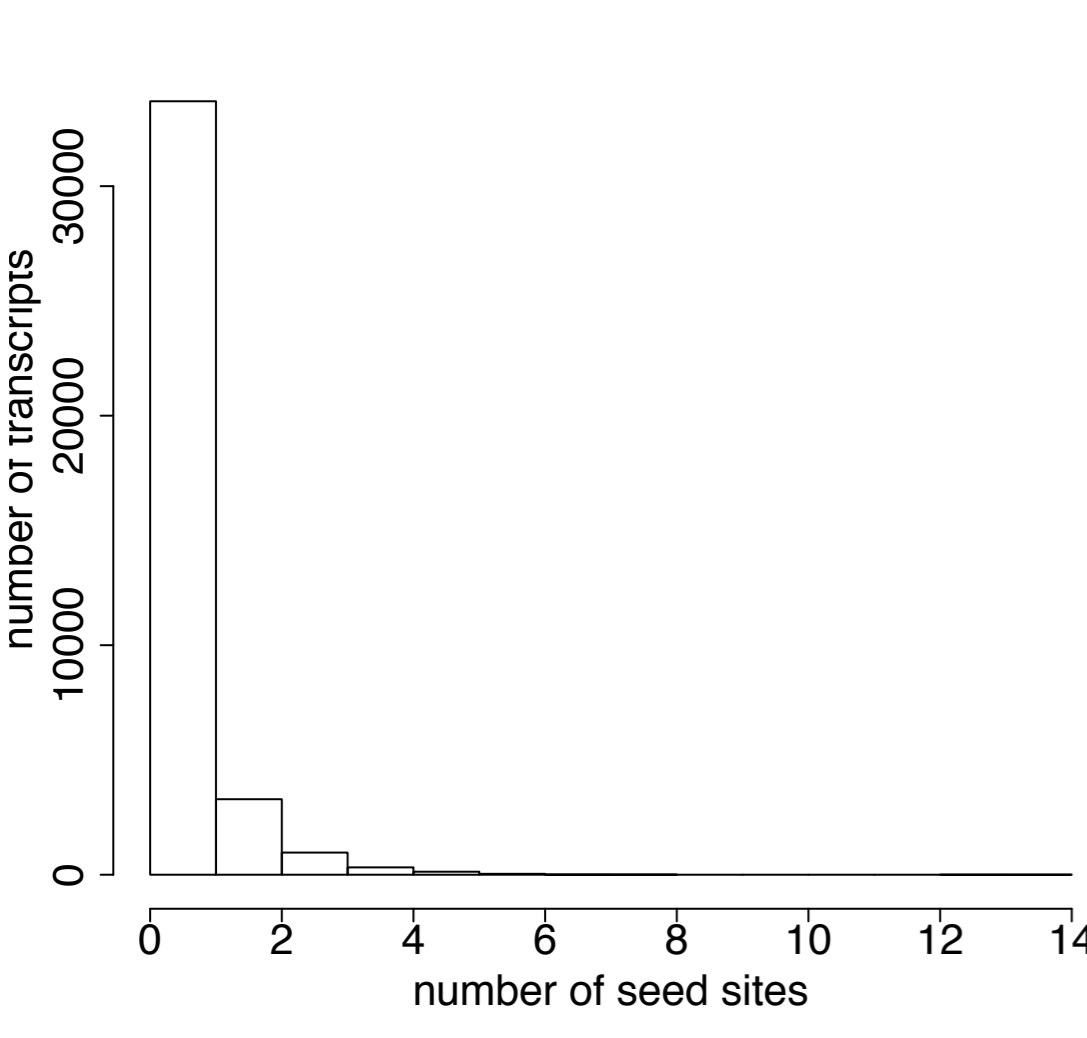**miR-17-5p-iso centered OMM sites**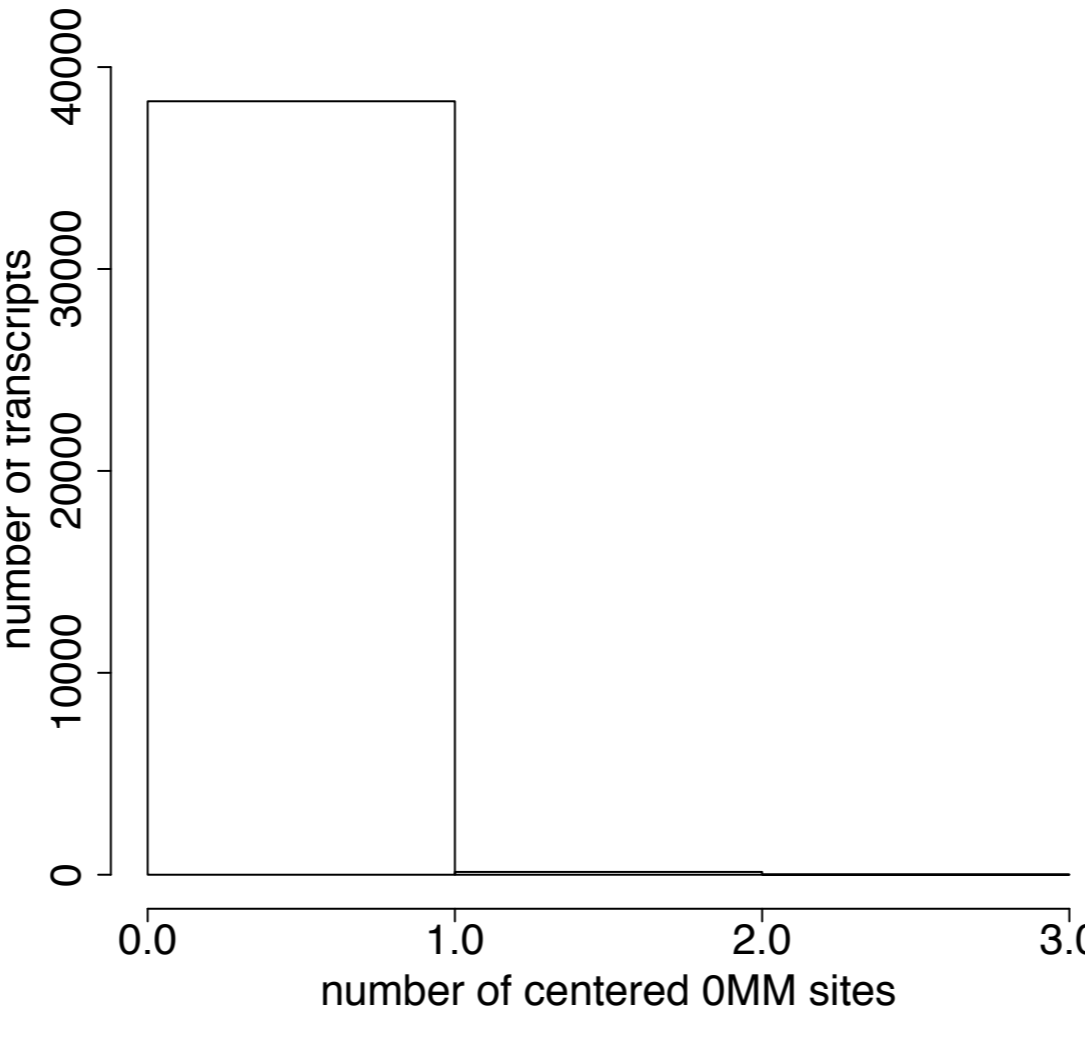**miR-17-5p-iso centered 1MM sites**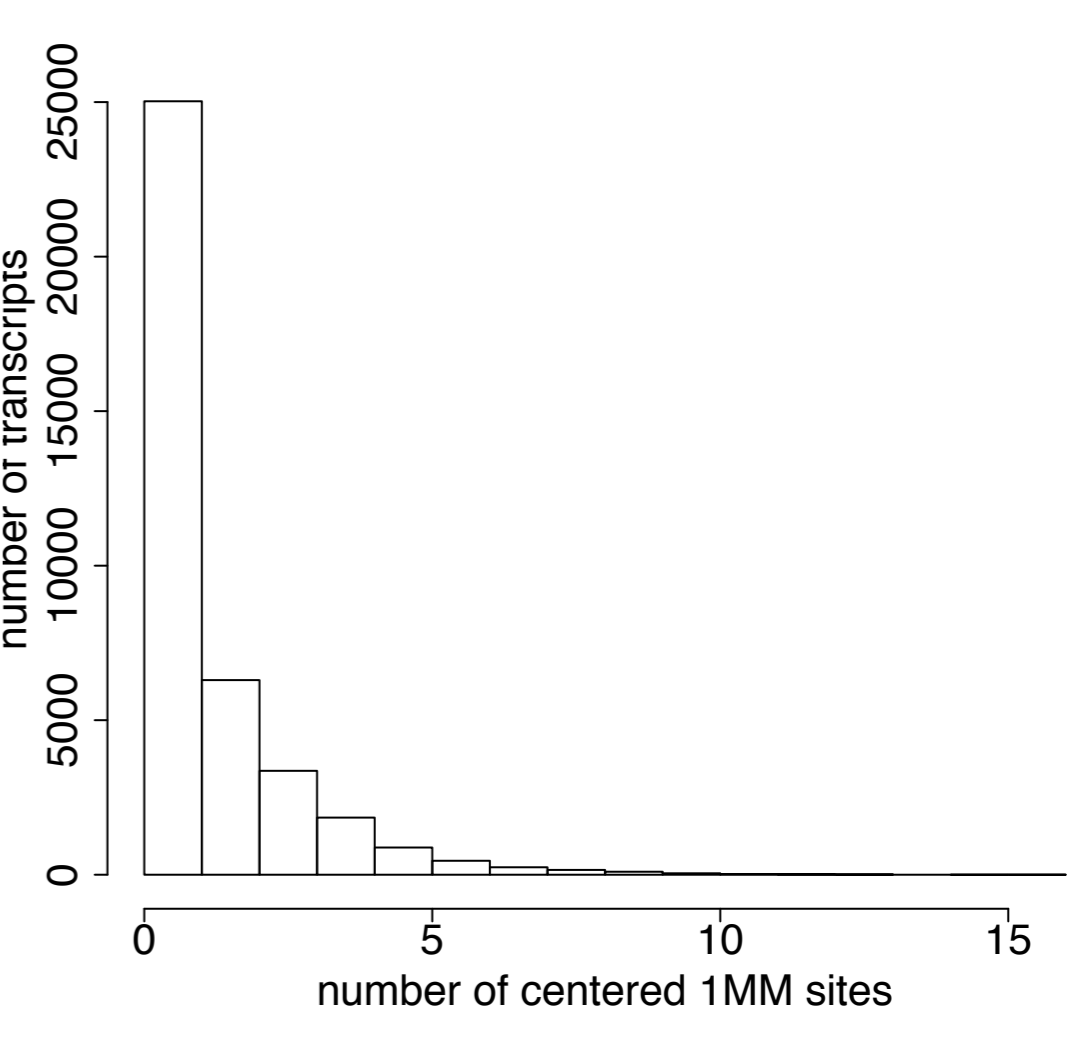**miR-17-5p seed sites**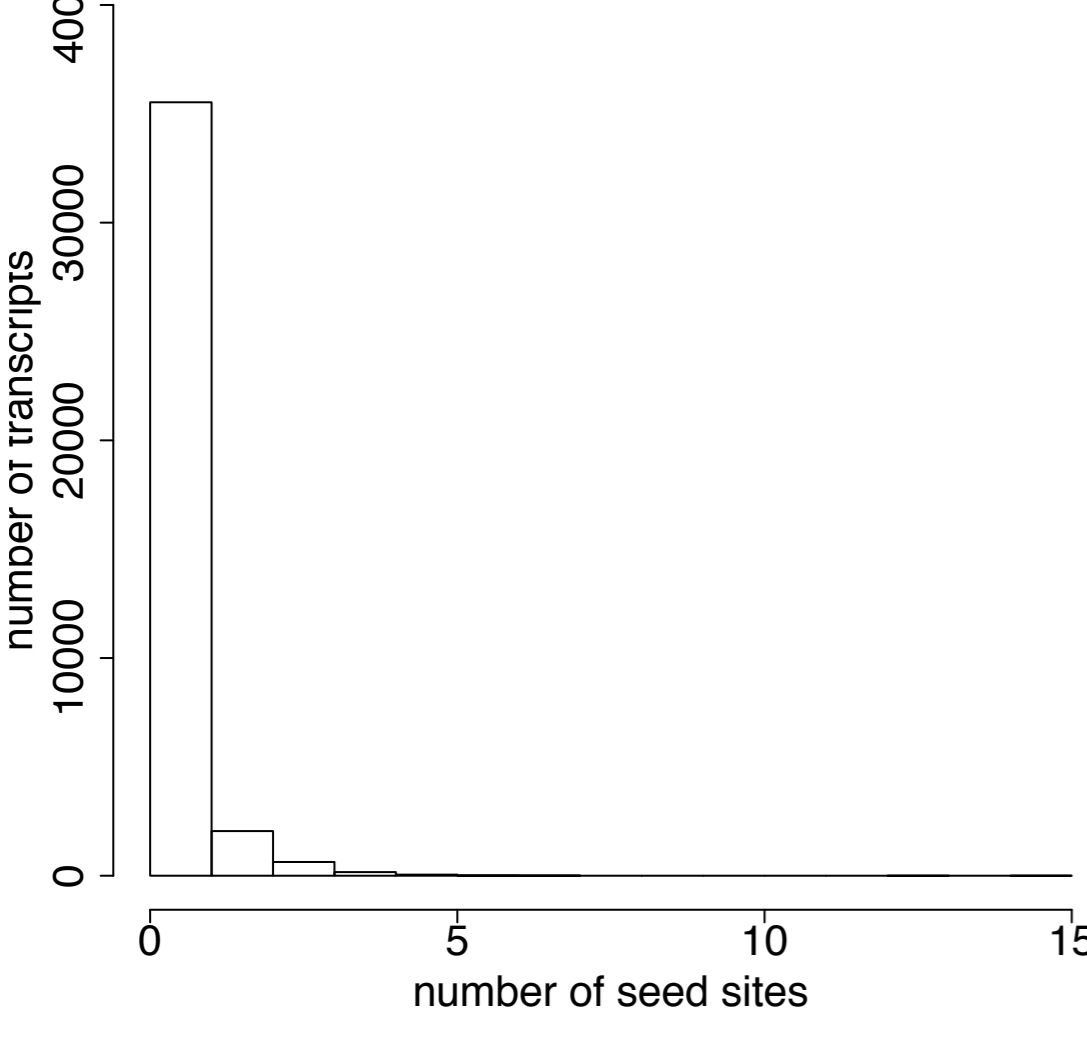**miR-17-5p centered OMM sites**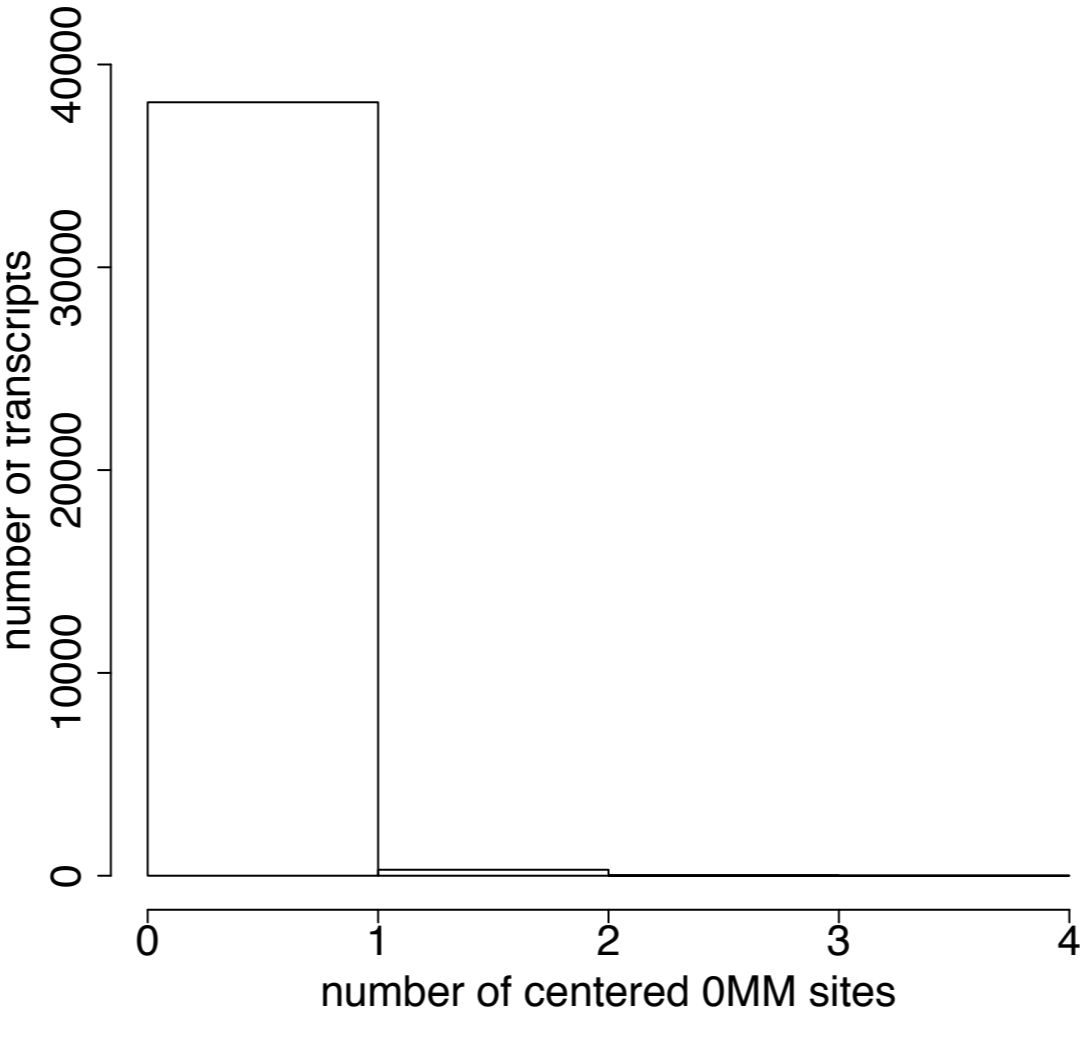**miR-17-5p centered 1MM sites**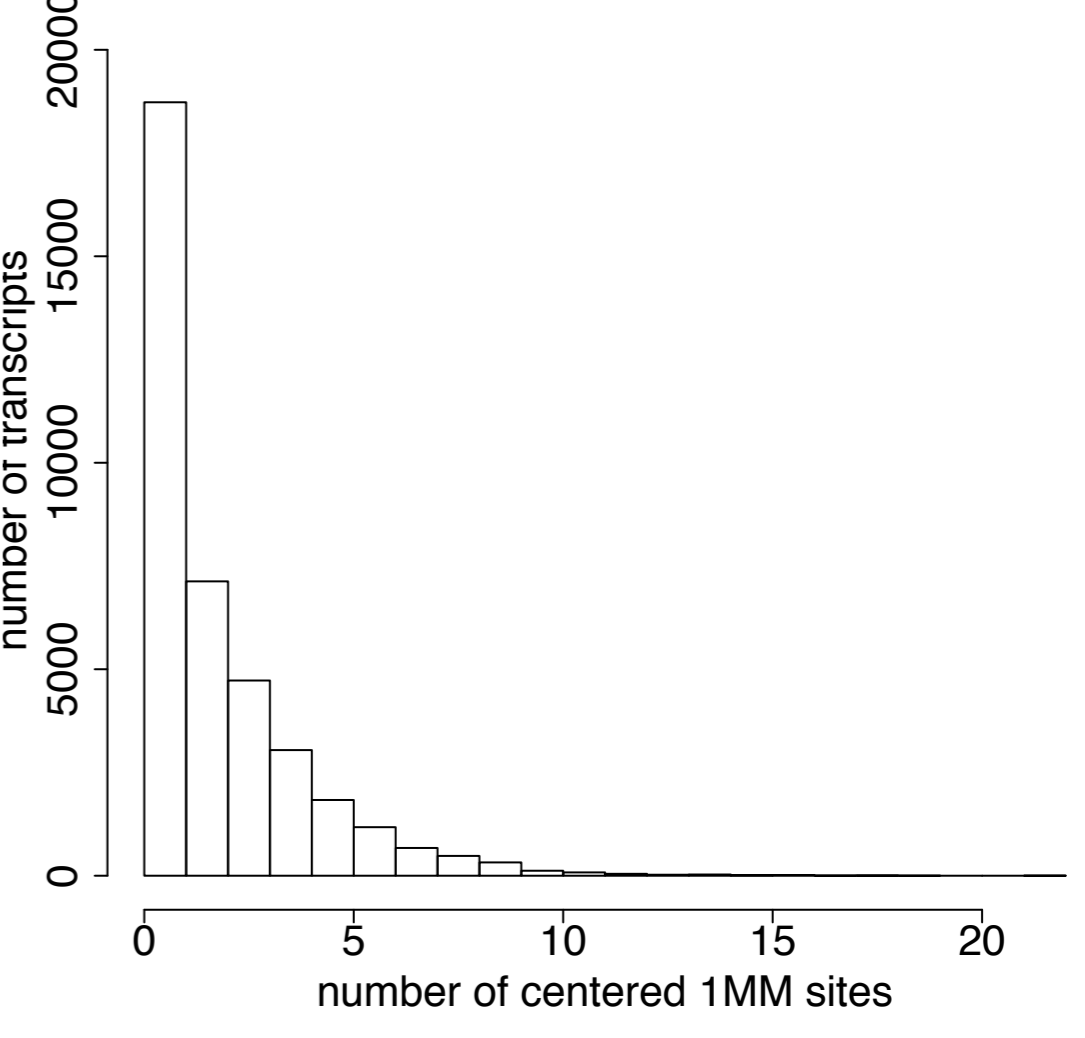**miR-182-iso seed sites**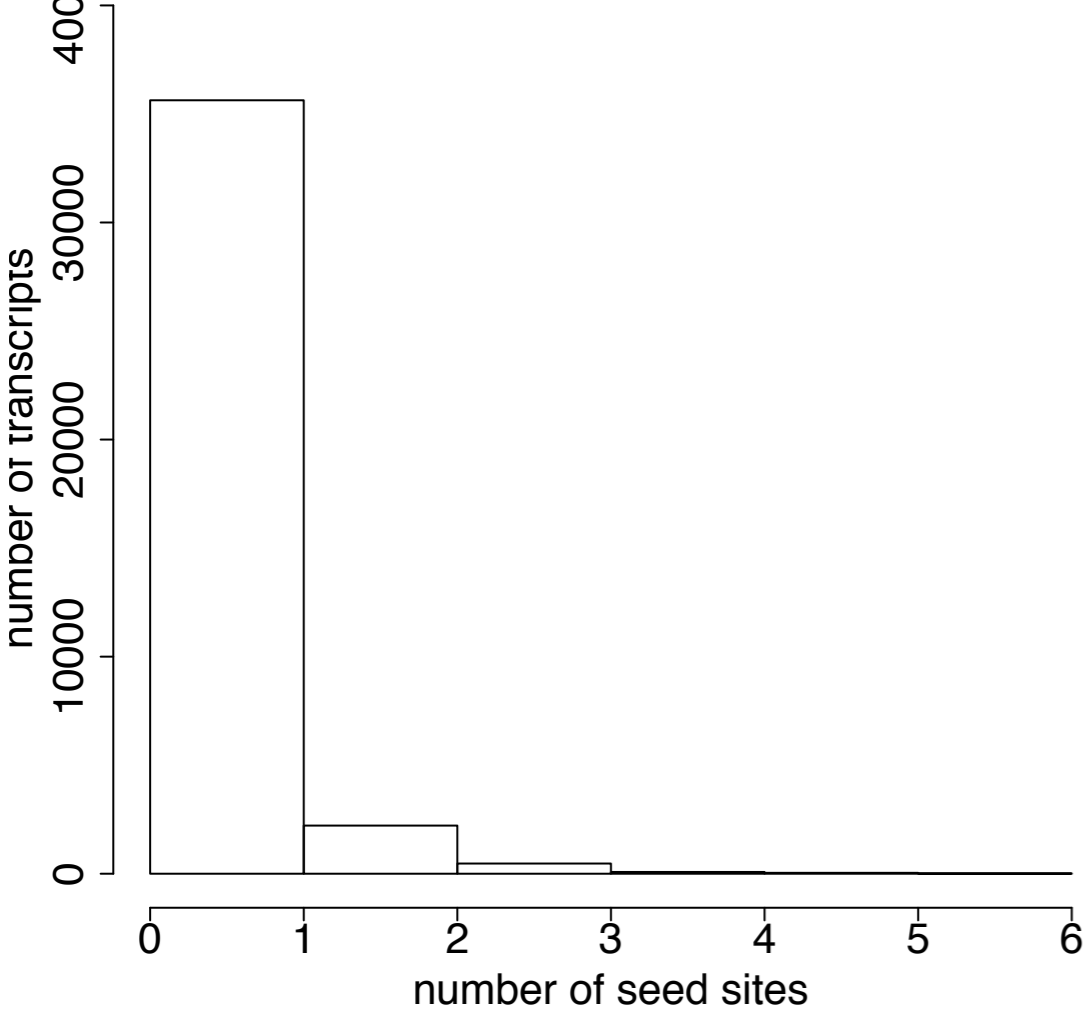**miR-182-iso centered OMM sites**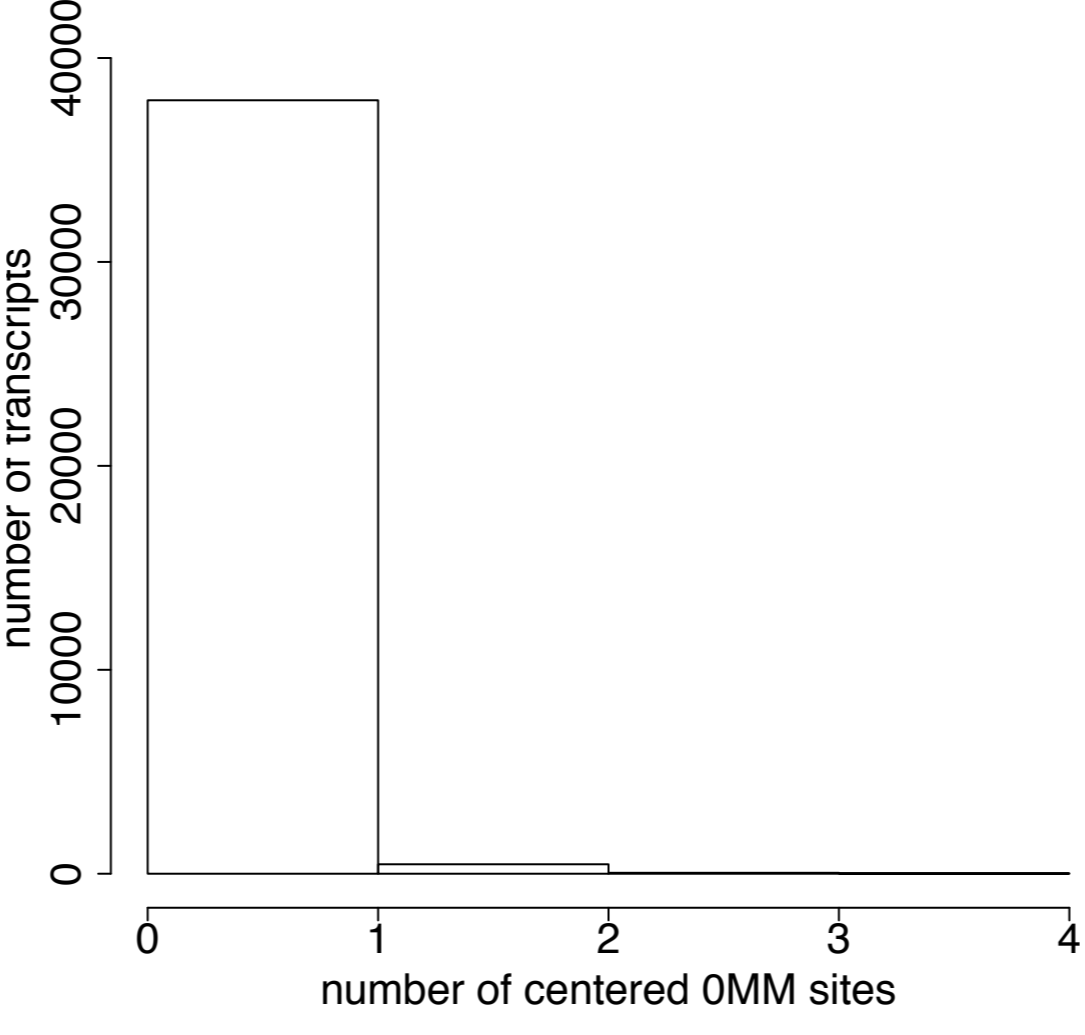**miR-182-iso centered 1MM sites**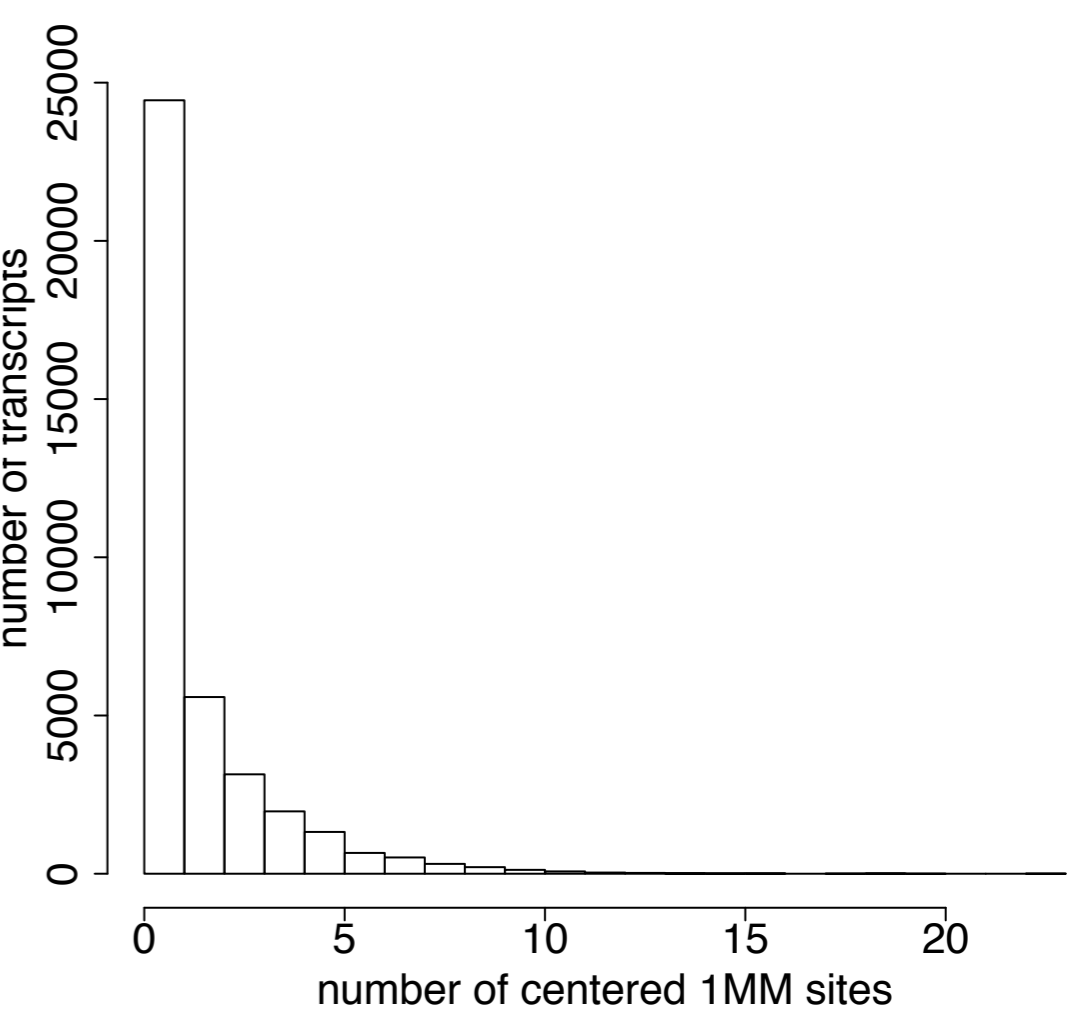**miR-182 seed sites**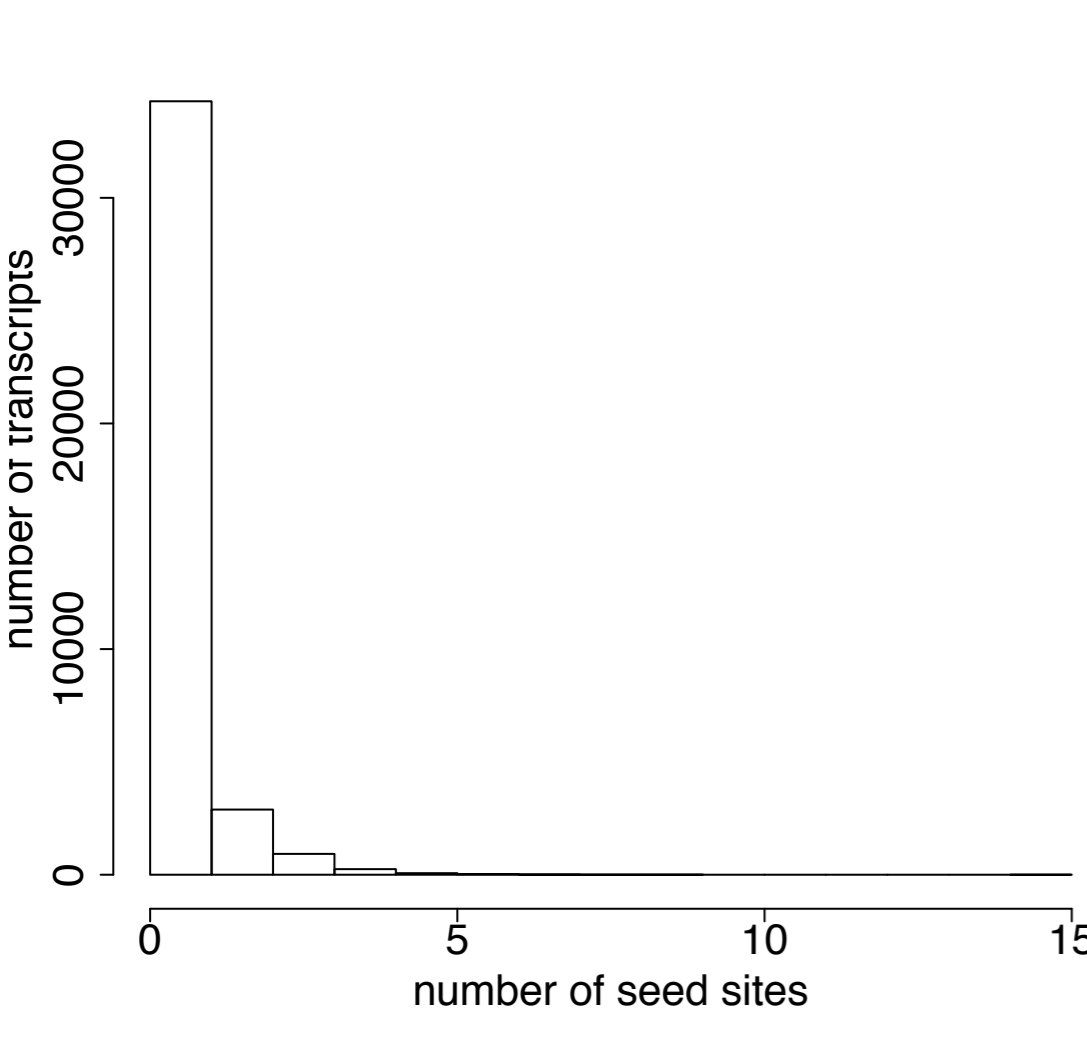**miR-182 centered OMM sites**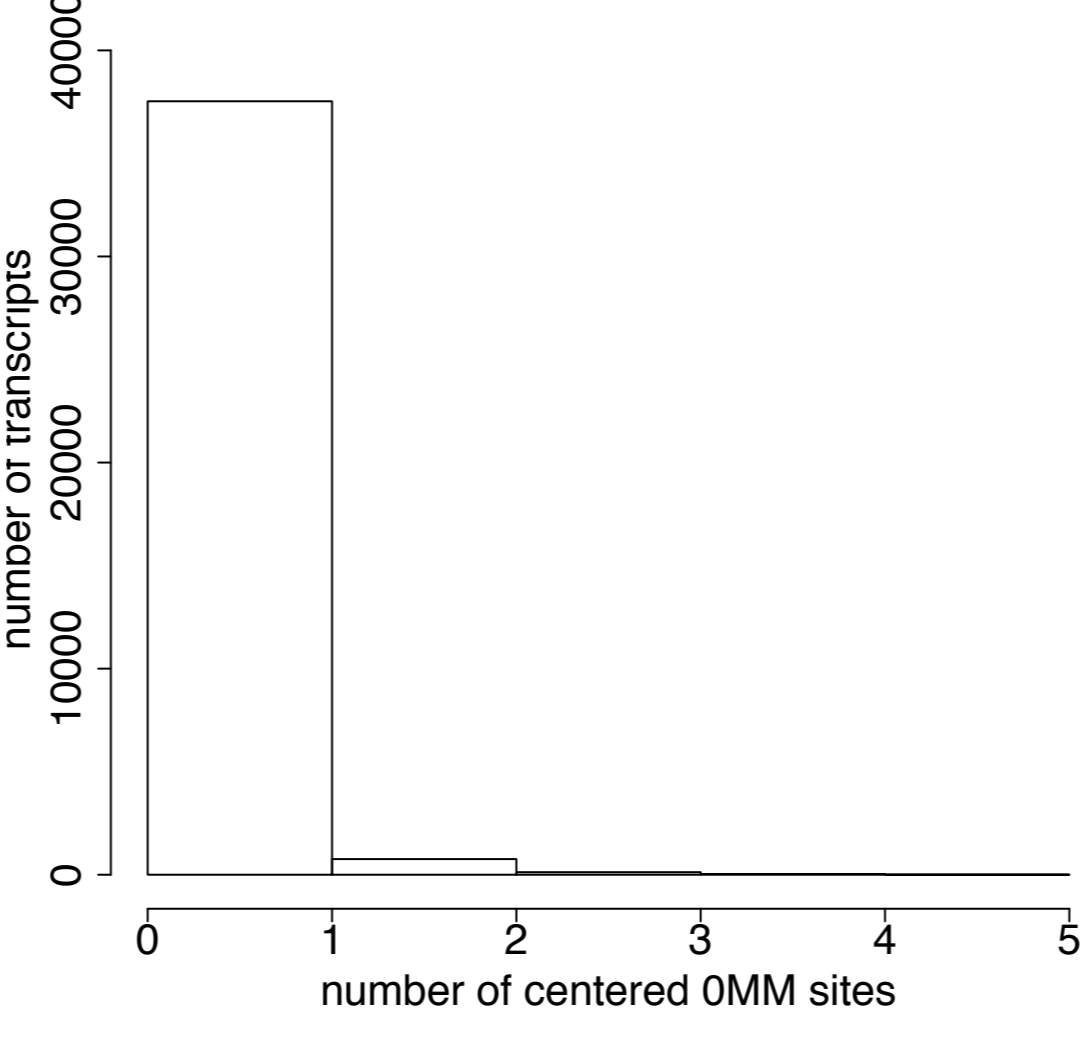**miR-182 centered 1MM sites**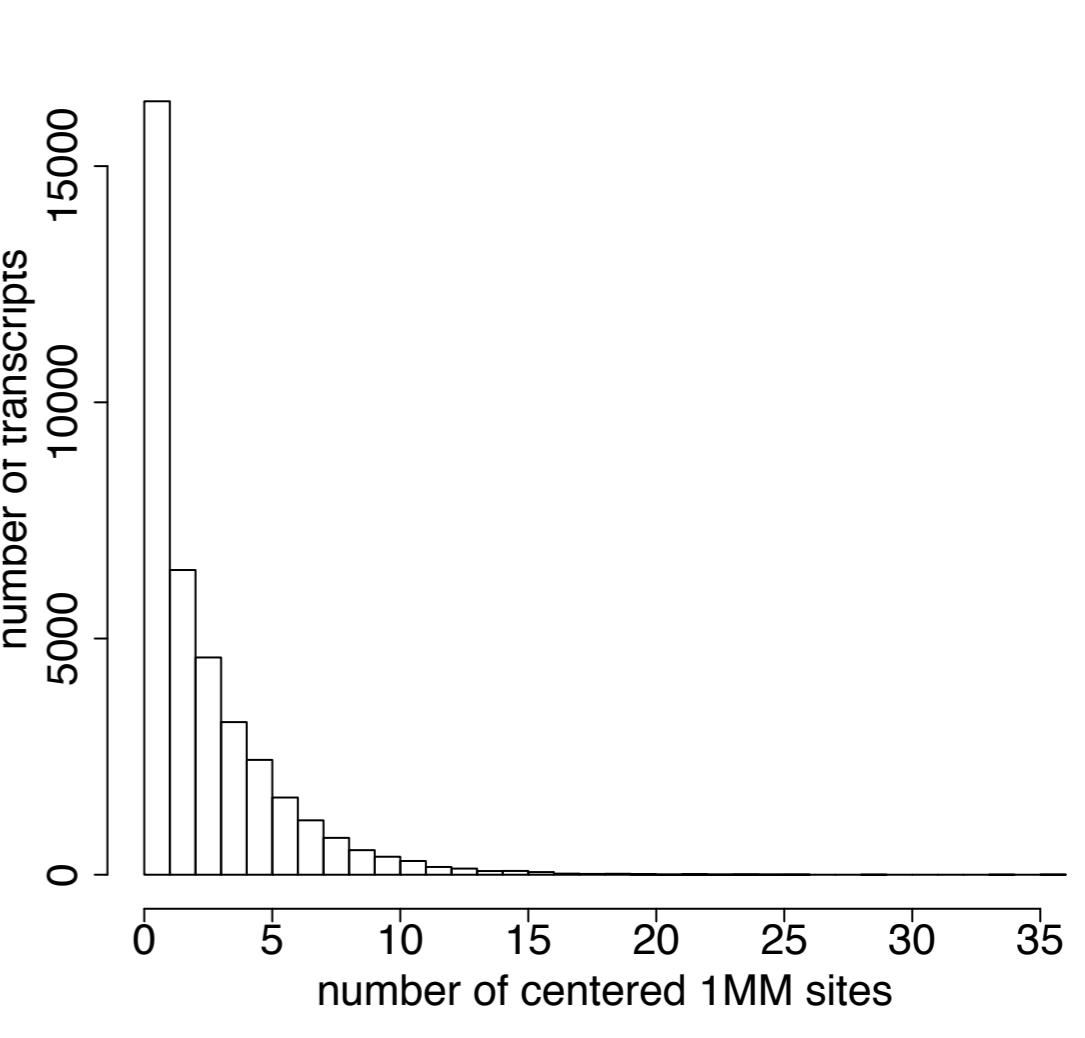**miR-23b seed sites**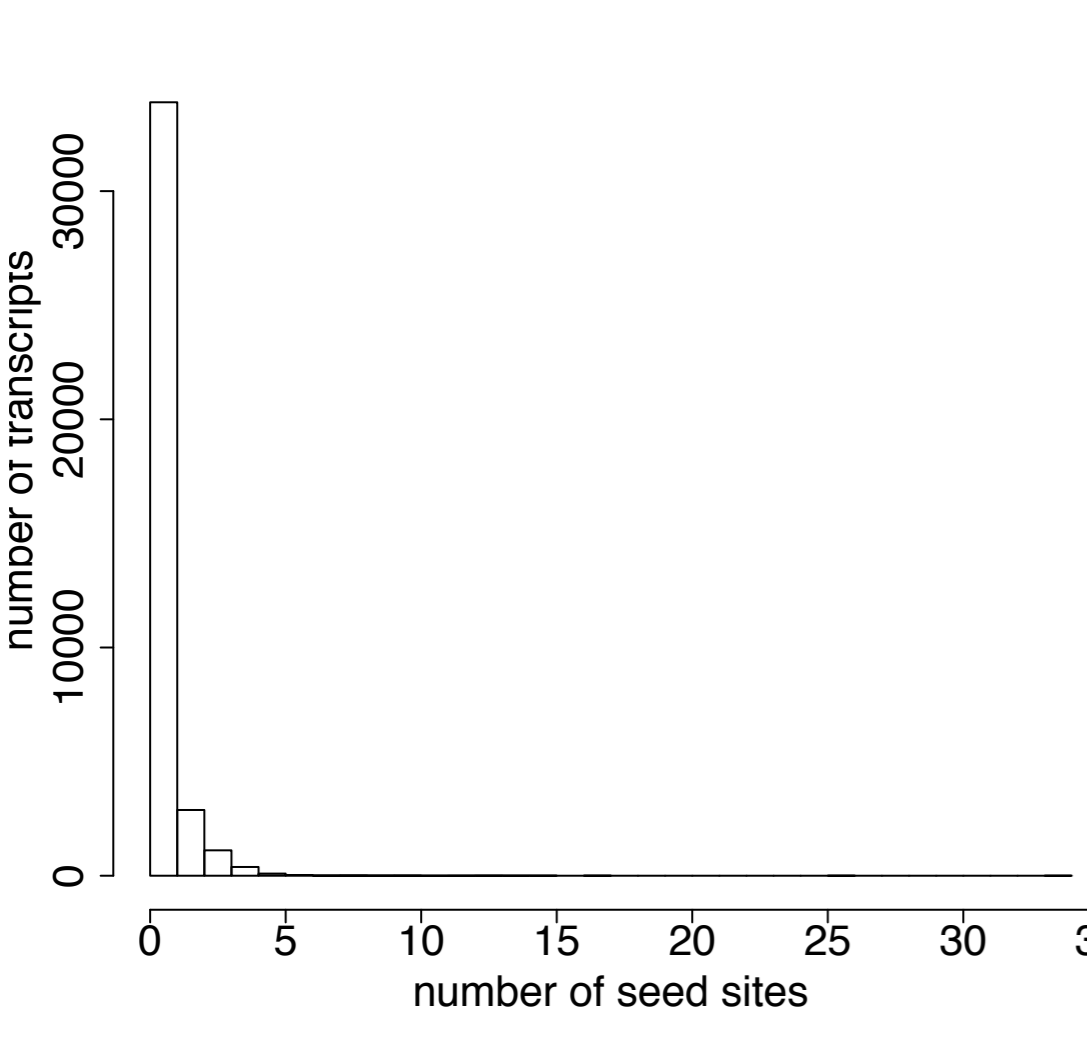**miR-23b centered OMM sites**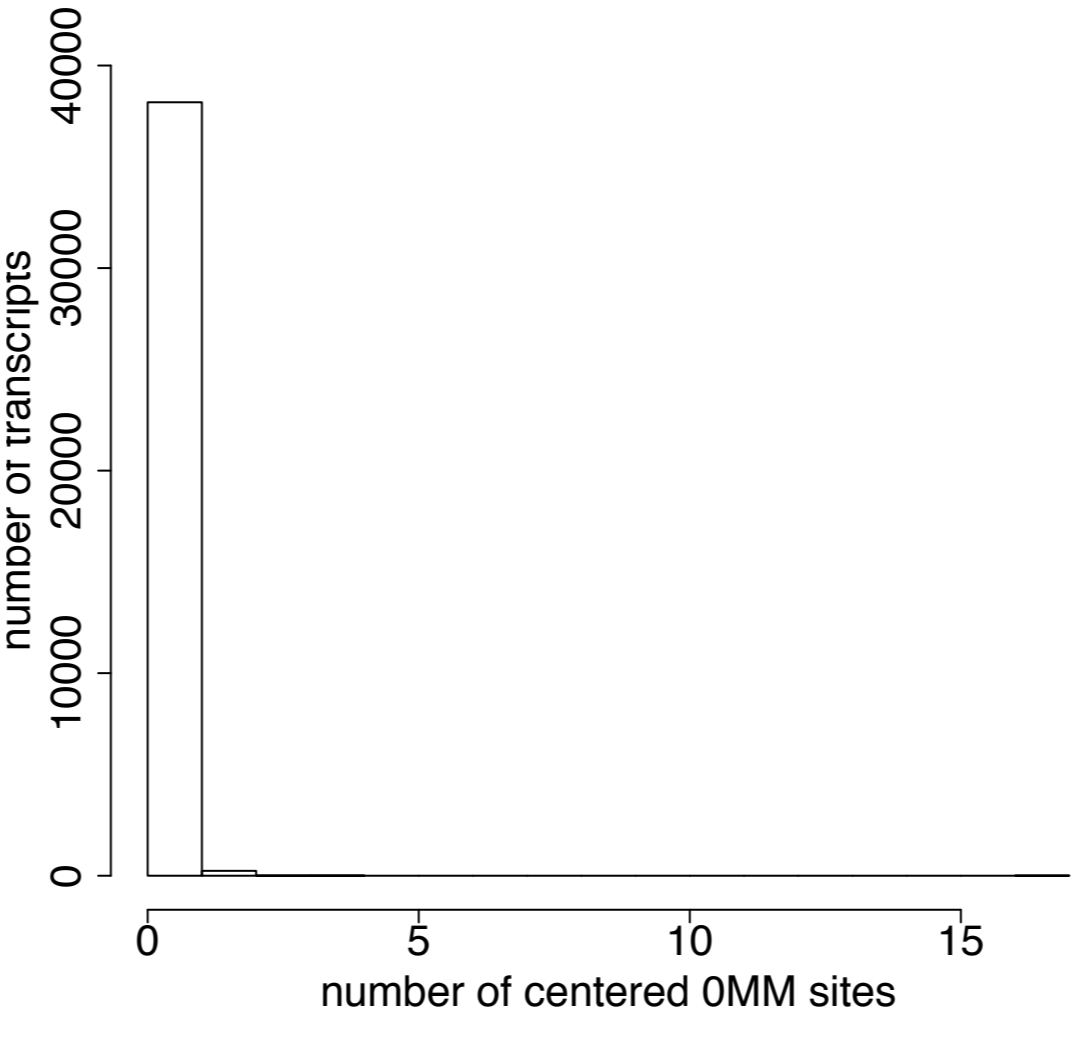**miR-23b centered 1MM sites**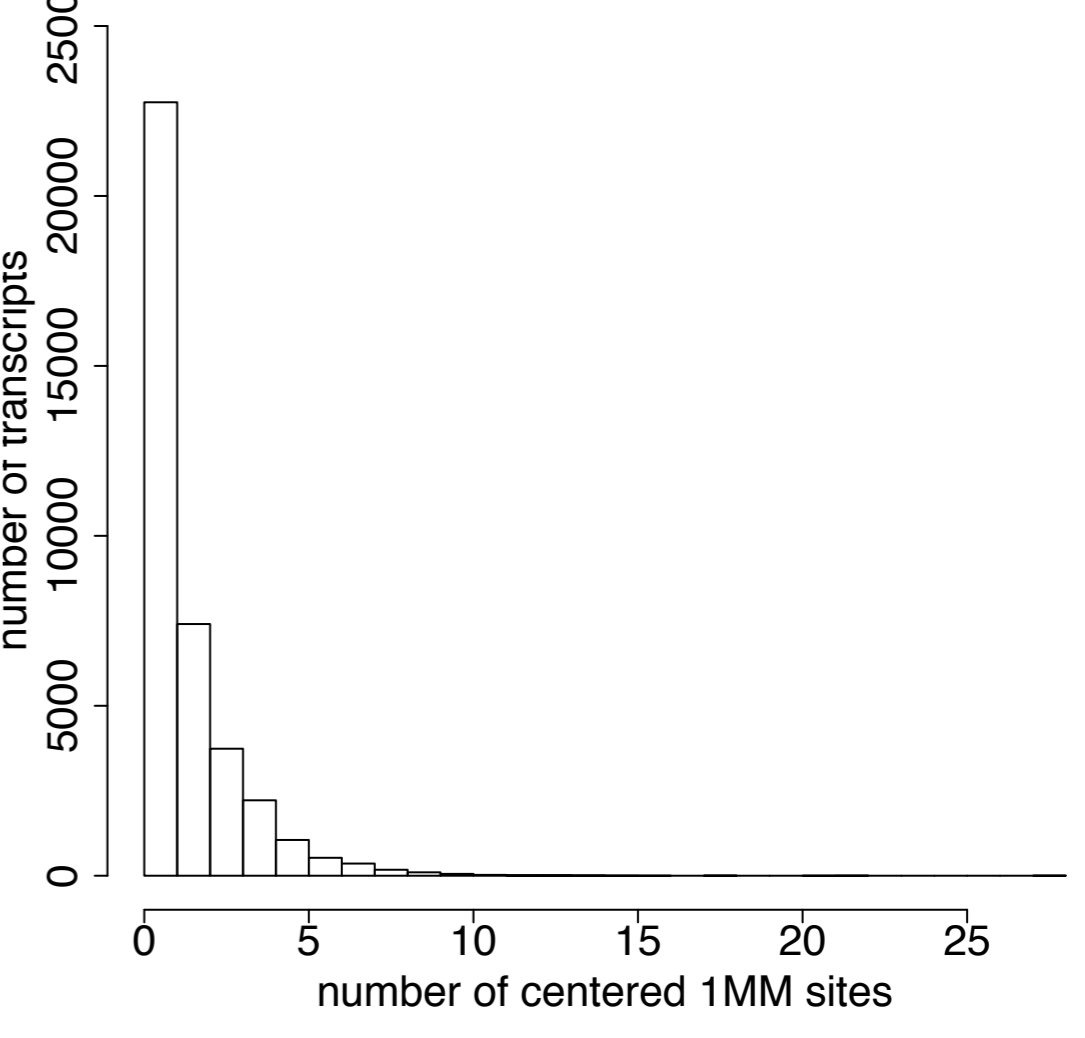**miR-27a seed sites**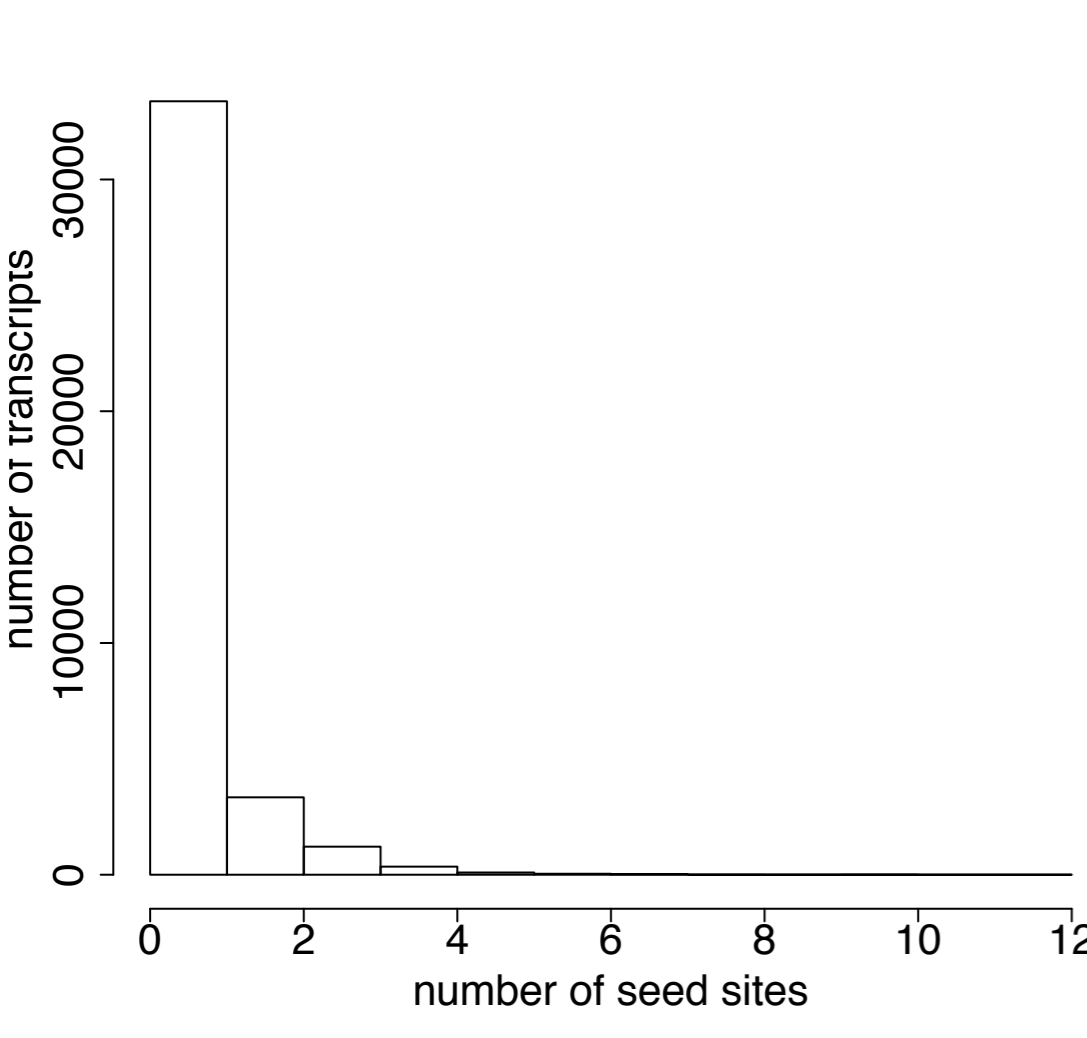**miR-27a centered OMM sites**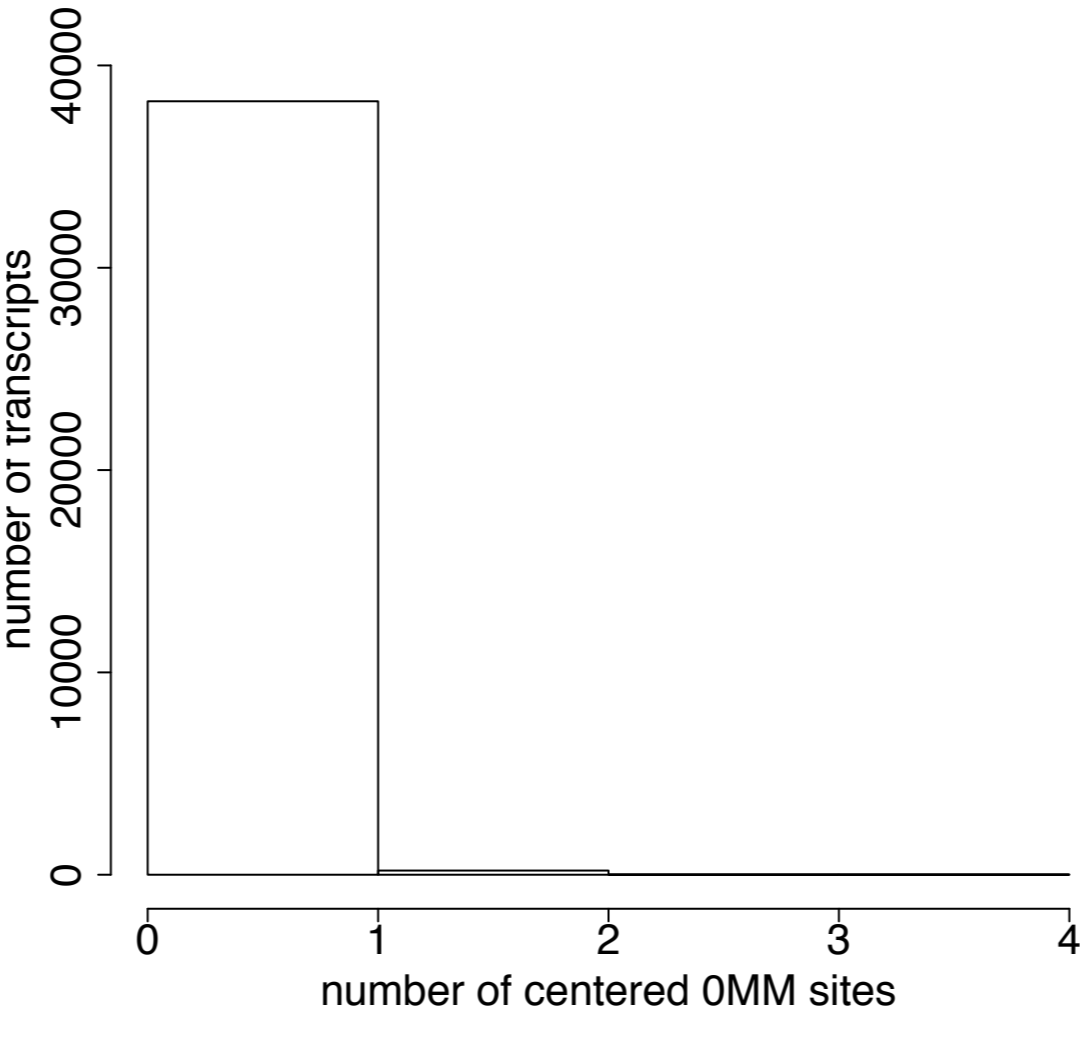**miR-27a centered 1MM sites**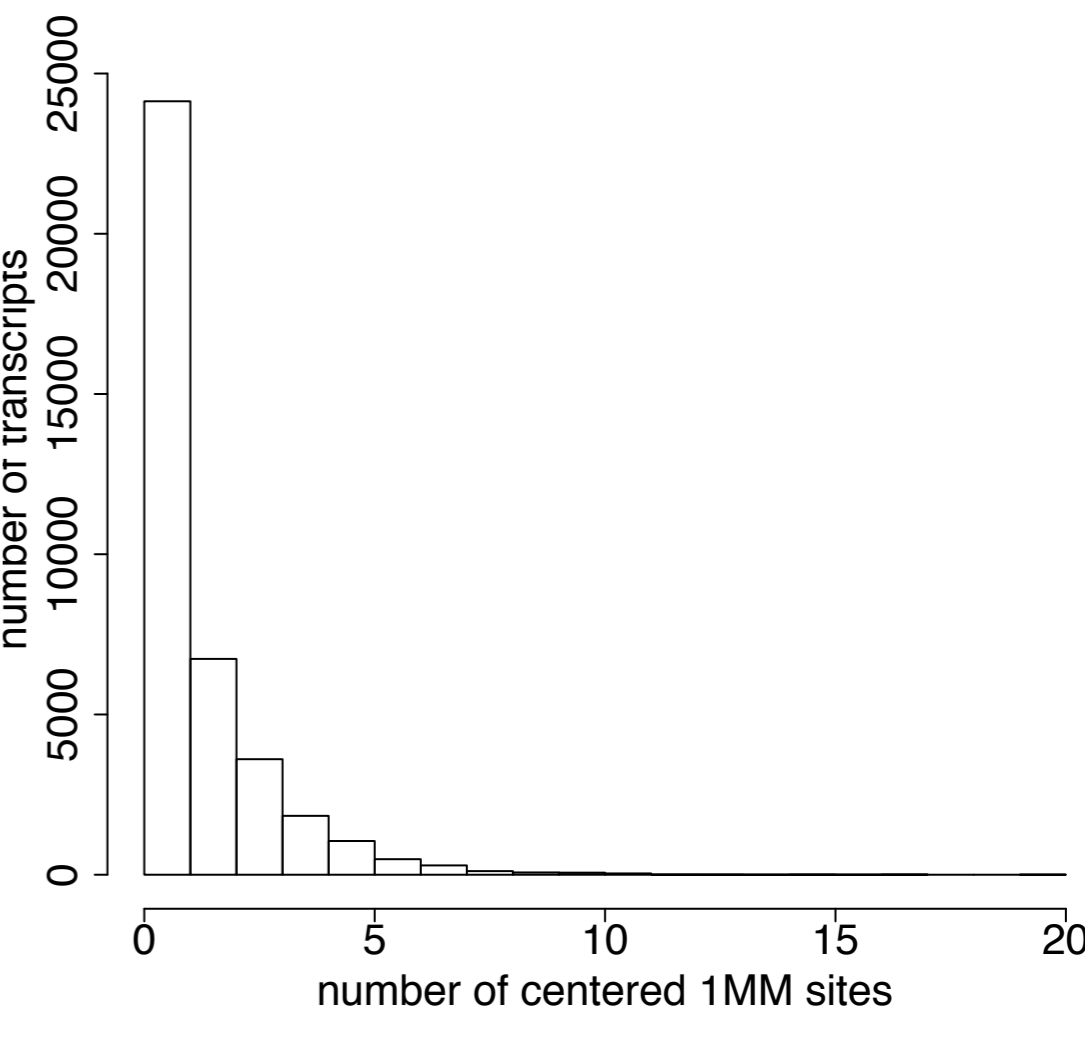

Supplement: gb-2014-15-3-r51-S6.pdf [file gb-2014-15-3-r51-S6.pdf]
