# Supplementary material for: Imperfect centered miRNA binding sites are common and can mediate repression of target mRNAs
Source: PubMed Central journal article supplement (PMC4053950; doi:10.1186/gb-2014-15-3-r51), 2014-03-14

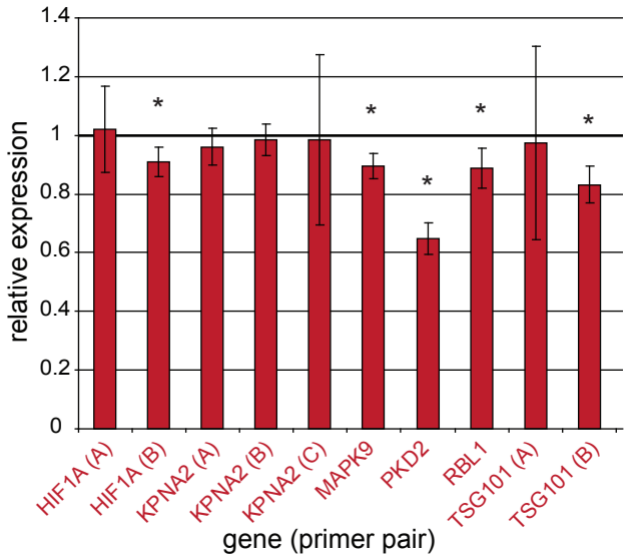

Supplement: gb-2014-15-3-r51-S5.pdf [file gb-2014-15-3-r51-S5.pdf]
